# Supplementary figures and images for: Proposal for heart failure progression based on the ‘chloride theory’: worsening heart failure with increased vs. non‐increased serum chloride concentration
Source: PubMed Central journal article supplement — ESC Heart Fail. 2017 Jul 17;4(4):623–31. doi: 10.1002/ehf2.12191 (PMC5695179; doi:10.1002/ehf2.12191), 2017-07-17

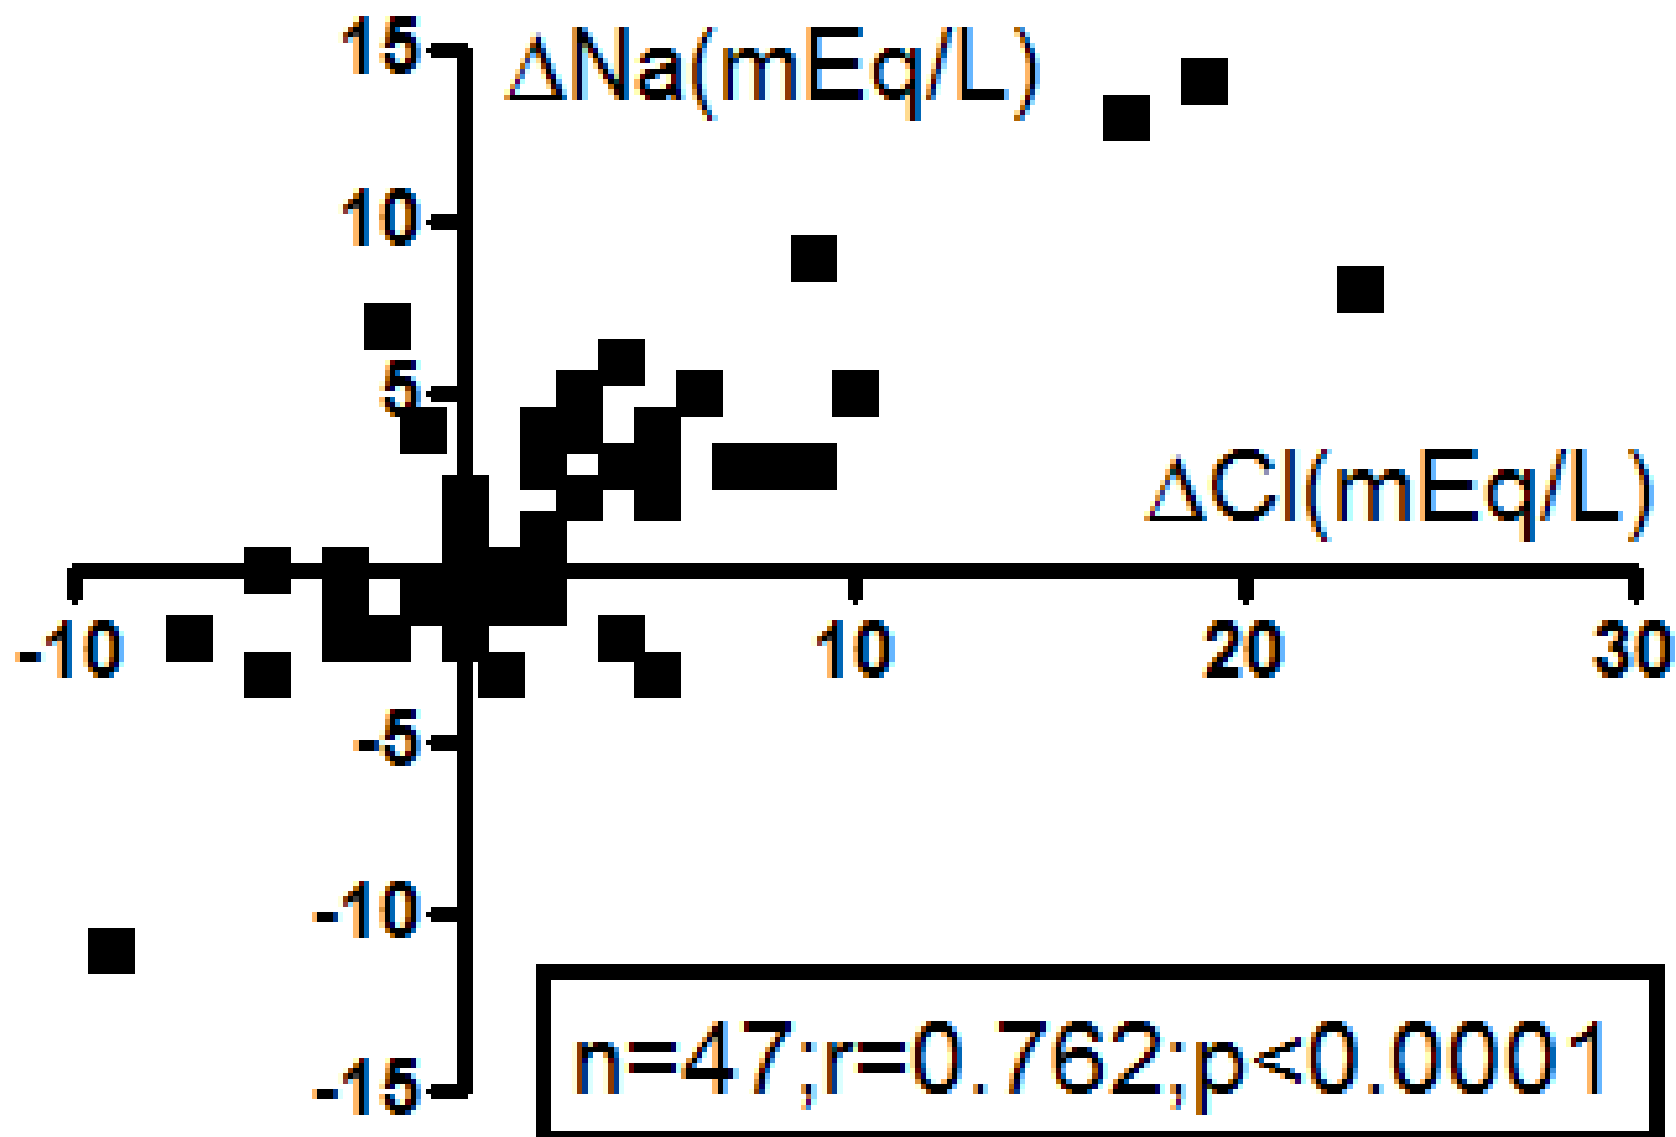

Supplement: EHF2-4-623-s001.pdf [file EHF2-4-623-s001.pdf]
